# Supplementary material for: The SsAtg1 Activating Autophagy Is Required for Sclerotia Formation and Pathogenicity in Sclerotinia sclerotiorum
Source: MDPI journal article supplement (doi:10.3390/jof8121314), 2022-12-17
Supplement: s1 [file s1]

Table S10 Primer information

| Primers       | Sequence (5'-3')                           |
|---------------|--------------------------------------------|
| SsAtg1F1      | CTCCCGTGATTAGATTG                          |
| SsAtg1R1      | TCCTGTGTGAAATTGTTATCCGCTAAGGTTGGTGGACTTCGT |
| SsAtg1F2      | GTCGTGACTGGGAAAACCCTGGCTCAGTCTCCCAACTCAAT  |
| SsAtg1R2      | ACAACCATAGGCACAATA                         |
| M13R          | AGCGGATAACAATTTCAACACAGGA                  |
| NLC37         | GGATGCCTCCGCTCGAAGTA                       |
| M13F          | CGCCAGGGTTTTCCCAGTCACGAC                   |
| NLC38         | CGTTGCAAGACCTGCCTGAA                       |
| SsAtg1F3      | AGCCTTGTTTACTGTTTGT                        |
| SsAtg1R3      | GACTCGCAGCCATCTCAT                         |
| BD-SsAtg1F    | GGATCCGTATGGCCTCCAAGACTCCTT                |
| BD-SsAtg1R    | CTGCAGTTAATGCGGTGGAGTATTGG                 |
| pYF11-SsAtg1F | GTAGGAACCCAATCTTCAAAATGGCCTCCAAGACTCCTTC   |
| pYF11-SsAtg1R | AGCTCCTCGCCCTTGCTCACATGCGGTGGAGTATTGGCGA   |
| QSsAtg1F      | GCTTGCCGAGACTTTATGCG                       |
| QSsAtg1R      | ATCGGCTCGTGCATCGTATT                       |
| actinF        | GAATGTGTAAGGCCGGTTTCGC                     |
| actinR        | CATCCCAGTTGGTGACGACACC                     |
| QSsscdF       | ACTCGAATCCATCATCGCCC                       |
| QSsscdR       | TCGCATGACTGTGTCCCTTC                       |
| QSsThrF       | GAAATCGAGGGGCTCGGTAG                       |
| QSsThrR       | ACCGGACATATTGGCAGCAA                       |
| QSsnox1F      | TTTCTGGTCGGTTCACGGAG                       |
| QSsnox1R      | CGAGACCTCGGGACAACAAA                       |
| QSsnox2F      | AGCCAAACTCTACGACGGTG                       |
| QSsnox2R      | CCAGTACCGATAAGGACCGC                       |

|         |                      |
|---------|----------------------|
| QSpac1F | GATCCCGTCGTCGTTACTC  |
| QSpac1R | CAATTGACTCAGGGCGAGGT |
